# Supplementary material for: Environmental influence on the seasonal movements of satellite-tracked ocean sunfish Mola mola in the north-east Atlantic
Source: Springer Nature journal article supplement (doi:10.1186/s40317-016-0099-2), 2016-02-08
Supplement: MOESM2 [file 40317_2016_99_MOESM2_ESM.doc]

**Table S1 Coefficients of the overall RSPF model of sunfish distribution.**  Model coefficients are shown for each of the four variables selected for modelling the probability of occurrence of sunfish, within the species 95% MCP based on tracked individuals.

|  | **β** | **SE** | **z value** | ***p value*** | **exp(β)** | **2.50%** | **97.50%** |
| --- | --- | --- | --- | --- | --- | --- | --- |
| **(Intercept)** | 17.4139 | 3.8371 | 4.538 | 5.67E-06 | 3.65E+07 | 9.893 | 24.934 |
| **SST** | -0.5258 | 0.1112 | -4.728 | 2.26E-06 | 0.59 | -0.744 | -0.308 |
| **Chlorophyll *a*** | -0.2635 | 0.1823 | -1.445 | 0.1484 | 0.77 | -0.621 | 0.094 |
| **Slope SST** | 4.1039 | 0.9511 | 4.315 | 1.60E-05 | 60.58 | 2.240 | 5.968 |
| **SST anomalies** | 0.609 | 0.2859 | 2.13 | 0.0332 | 1.84 | 0.049 | 1.169 |
