# Supplementary material for: Environmental influence on the seasonal movements of satellite-tracked ocean sunfish Mola mola in the north-east Atlantic
Source: Springer Nature journal article supplement (doi:10.1186/s40317-016-0099-2), 2016-02-08
Supplement: MOESM3 [file 40317_2016_99_MOESM3_ESM.doc]

**Table S1 Relative importance of each variable to the final model.** Step-wise models were generated excluding each variable at a time and deviances were calculated informing on the significance of each parameter to the full model (deviance, AIC, Δdeviance, ΔAIC, p value, relative likelihood and wAIC). Clearly, gradients of SST and SST were the most influent variables providing the highest % of significant variability explained (Δdeviance) and both features had the lowest wAIC if removed.

|  | **Deviance** | **AIC** | **Δdeviance** | ***p value*** | **ΔAIC** | **relat. LL** | **wAIC** |
| --- | --- | --- | --- | --- | --- | --- | --- |
| **Full** | 3197.4 |  |  |  | 0 | 1.000 | 0.452 |
| **No SST** | 3230.2 | 3238.2 | 32.8 | 6.22E-11 | 40.750 | 1.42E-09 | 6.41E-10 |
| **No Chl a** | 3190.5 | 3198.5 | 6.9 | 0.080 | 1.061 | 0.588 | 0.266 |
| **No SST slope** | 3227.2 | 3235.2 | 29.8 | 2.94E-10 | 37.715 | 6.46E-09 | 2.92E-09 |
| **No SST Anomalies** | 3190.4 | 3198.4 | 7.0 | 0.086 | 0.946 | 0.623 | 0.282 |
