# Supplementary material for: Environmental influence on the seasonal movements of satellite-tracked ocean sunfish Mola mola in the north-east Atlantic
Source: Springer Nature journal article supplement (doi:10.1186/s40317-016-0099-2), 2016-02-08
Supplement: MOESM4 [file 40317_2016_99_MOESM4_ESM.doc]

**Table S1 Seasonal model coefficients output.** Individual variable importance also shown by the wAIC column of each model.

|  | **Parameter** | **β** | **SE** | **z value** | ***p value*** | **Model** | **Deviance** | **AIC** | **Δdeviance** | ***p value*** | **ΔAIC** | **relat. LL** | **wAIC** |
| --- | --- | --- | --- | --- | --- | --- | --- | --- | --- | --- | --- | --- | --- |
| **Summer** | **Intercept** | -2.473 | 0.385 | -6.430 | 1.27E-10 | **Full** | 1011.8 | 1021.8 |  |  | 1.613 | 0.45 | 0.22 |
| **SST** | -0.288 | 0.041 | -7.001 | 2.55E-12 | **No SST** | 1051.4 | 1059.4 | 39.60 | 3.12E-10 | 39.212 | 0.00 | 0.00 |
| **Chlorophyll *a*** | -0.062 | 0.094 | -0.663 | 0.5070 | **No Chl *a*** | 1012.2 | 1020.2 | 0.39 | 0.534 | 0.000 | 1.00 | 0.49 |
| **SST Gradients** | 1.461 | 0.403 | 3.625 | 0.0003 | **No SST slope** | 1024.0 | 1032.0 | 12.18 | 0.000 | 11.794 | 0.00 | 0.00 |
| **SST Anomalies** | 0.206 | 0.169 | 1.216 | 0.2240 | **No SST anomalies** | 1013.2 | 1021.2 | 1.43 | 0.231 | 1.047 | 0.59 | 0.29 |
| **Spring** | **Intercept** | 27.533 | 10.509 | 2.620 | 8.79E-03 | **Full** | 915.8 | 925.8 |  |  | 1.090 | 0.58 | 0.16 |
| **SST** | -0.782 | 0.461 | -1.697 | 8.98E-02 | **No SST** | 920.4 | 928.4 | 4.59 | 0.032 | 3.678 | 0.16 | 0.04 |
| **Chlorophyll *a*** | 0.139 | 1.723 | 0.080 | 0.9359 | **No Chl *a*** | 916.7 | 924.7 | 0.91 | 0.339 | 0.003 | 1.00 | 0.27 |
| **SST Gradients** | 7.148 | 3.783 | 1.890 | 0.0588 | **No SST slope** | 916.8 | 924.8 | 1.06 | 0.304 | 0.146 | 0.93 | 0.25 |
| **SST Anomalies** | 2.082 | 2.626 | 0.793 | 0.4280 | **No SST anomalies** | 916.7 | 924.7 | 0.91 | 0.340 | 0.000 | 1.00 | 0.27 |
| **Autumn** | **Intercept** | 19.148 | 6.765 | 2.831 | 4.65E-03 | **Full** | 861.3 | 871.3 |  |  | 0.371 | 0.83 | 0.33 |
| **SST** | -0.472 | 0.175 | -2.700 | 0.0693 | **No SST** | 873.8 | 881.8 | 12.48 | 0.000 | 10.848 | 0.00 | 0.00 |
| **Chlorophyll *a*** | -0.603 | 0.349 | -1.729 | 0.0839 | **No Chl *a*** | 863.7 | 871.7 | 2.36 | 0.125 | 0.728 | 0.69 | 0.27 |
| **SST Gradients** | 5.899 | 2.207 | 2.673 | 0.0075 | **No SST slope** | 896.1 | 904.1 | 34.77 | 3.71E-09 | 33.140 | 0.00 | 0.00 |
| **SST Anomalies** | 1.042 | 0.587 | 1.774 | 0.0760 | **No SST anomalies** | 863.0 | 871.0 | 1.63 | 0.202 | 0.000 | 1.00 | 0.40 |
| **Winter** | **Intercept** | -0.681 | 3.287 | -0.207 | 0.8360 | **Full** | 369.0 | 379.0 |  |  | 1.995 | 0.37 | 0.10 |
| **SST** | -0.145 | 0.162 | -0.897 | 0.3700 | **No SST** | 369.8 | 377.8 | 0.80 | 0.370 | 0.797 | 0.67 | 0.18 |
| **Chlorophyll *a*** | 0.024 | 0.363 | 0.067 | 0.9460 | **No Chl *a*** | 369.0 | 377.0 | 0.00 | 0.945 | 0.000 | 1.00 | 0.27 |
| **SST Gradients** | 0.564 | 0.641 | 0.881 | 0.3780 | **No SST slope** | 369.8 | 377.8 | 0.77 | 3.80E-01 | 0.766 | 0.68 | 0.18 |
| **SST Anomalies** | -0.123 | 0.485 | -0.254 | 0.7990 | **No SST anomalies** | 369.1 | 377.1 | 0.06 | 0.800 | 0.060 | 0.97 | 0.26 |
