# Supplementary material for: Environmental influence on the seasonal movements of satellite-tracked ocean sunfish Mola mola in the north-east Atlantic
Source: Springer Nature journal article supplement (doi:10.1186/s40317-016-0099-2), 2016-02-08
Supplement: MOESM5 [file 40317_2016_99_MOESM5_ESM.doc]

**Table S4** Statistical output from the seasonal models goodness of fit (GOF).

|  | **Winter** | **Summer** | **Spring** | **Autumn** |
| --- | --- | --- | --- | --- |
| **GOF** | χ2 = 0, df = 8, *p* > 0.05 | χ2 =15.22, df = 8, *p* > 0.05 | χ2 =20.42, df = 8, *p* > 0.05 | χ2 = 5.538, df = 8, *p* > 0.05 |
